# Supplementary material for: Photoinduced water splitting with oxotitanium porphyrin: a computational study
Source: Royal Society of Chemistry journal article supplement (doi:10.1039/c2cp41214d), 2012-01-01
Supplement: c2cp41214d.pdf [file c2cp41214d.pdf]

# **Photoinduced water splitting with oxotitanium porphyrin: a computational study**

Andrzej L. Sobolewski and Wolfgang Domcke

**Electronic Supplementary Information**

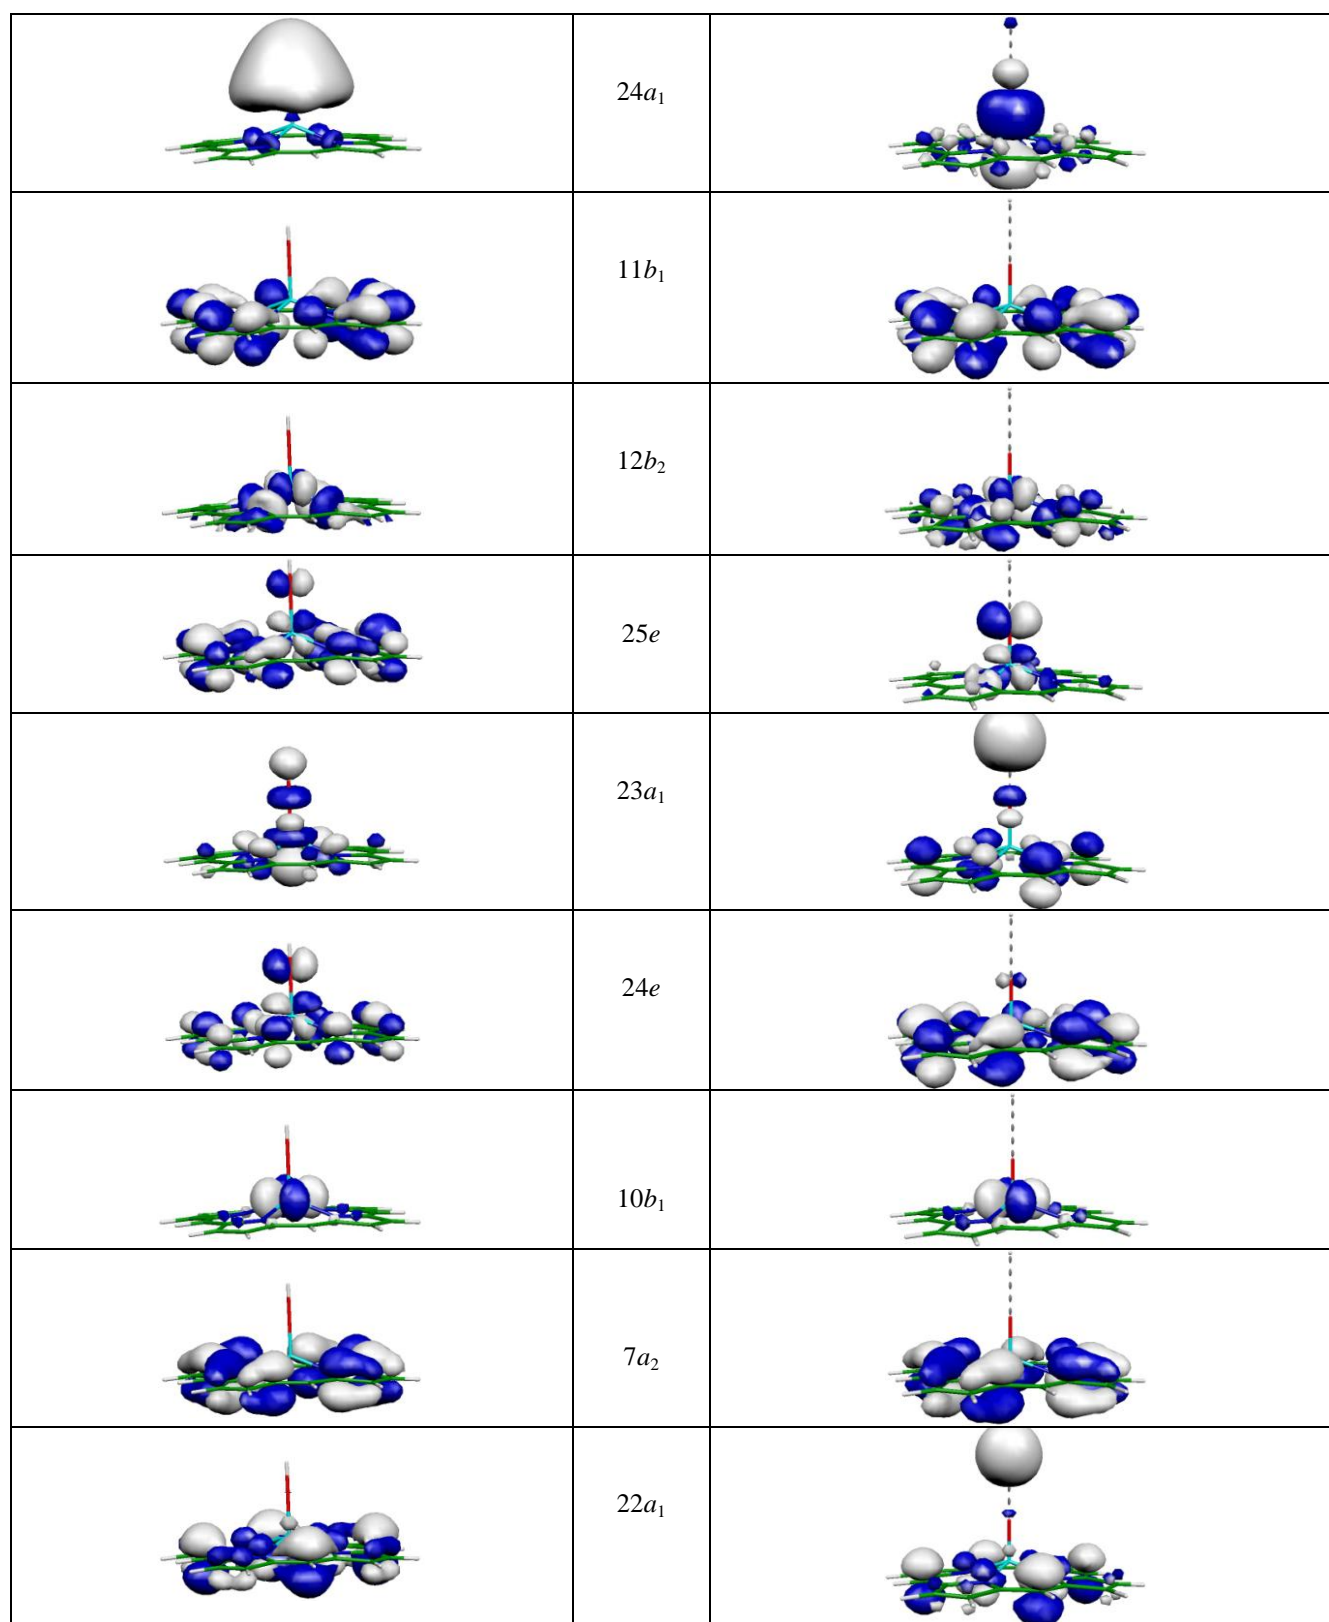

Fig. S1. The Kohn-Sham frontier orbitals of the TiPOH<sup>•</sup> radical at the equilibrium geometry of the <sup>2</sup>A<sub>1</sub> state ( $R_{\text{OH}} \approx 1.0$  Å, left column) and at the dissociation limit ( $R_{\text{OH}} = 2.7$  Å, right column). Only one component of the degenerate (*e*) orbitals is shown.

Cartesian coordinates (in Ångstrom) of the  $S_0(C_{4v})$  equilibrium geometry of TiOP optimized with the DFT/B3LYP/cc-pVDZ(TZVP at Ti) method.

38  
FINAL HEAT OF FORMATION = -1912.629930

|    |           |           |           |
|----|-----------|-----------|-----------|
| Ti | 0.000000  | 0.000000  | -0.613368 |
| O  | 0.000000  | 0.000000  | -2.232562 |
| N  | -1.452033 | 1.452033  | -0.032815 |
| N  | -1.452033 | -1.452033 | -0.032815 |
| N  | 1.452033  | -1.452033 | -0.032815 |
| N  | 1.452033  | 1.452033  | -0.032815 |
| C  | -3.490306 | 2.523372  | 0.111980  |
| C  | -3.490306 | -2.523372 | 0.111980  |
| C  | 3.490306  | -2.523372 | 0.111980  |
| C  | 3.490306  | 2.523372  | 0.111980  |
| C  | -2.813352 | 1.248881  | 0.024067  |
| C  | -2.813352 | -1.248881 | 0.024067  |
| C  | 2.813352  | -1.248881 | 0.024067  |
| C  | 2.813352  | 1.248881  | 0.024067  |
| C  | -1.248881 | 2.813352  | 0.024067  |
| C  | -1.248881 | -2.813352 | 0.024067  |
| C  | 1.248881  | -2.813352 | 0.024067  |
| C  | 1.248881  | 2.813352  | 0.024067  |
| C  | 2.523372  | 3.490306  | 0.111980  |
| C  | -2.523372 | 3.490306  | 0.111980  |
| C  | -2.523372 | -3.490306 | 0.111980  |
| C  | 2.523372  | -3.490306 | 0.111980  |
| C  | -3.441909 | 0.000000  | 0.032758  |
| C  | 0.000000  | -3.441909 | 0.032758  |
| C  | 3.441909  | 0.000000  | 0.032758  |
| C  | 0.000000  | 3.441909  | 0.032758  |
| H  | 2.651598  | 4.569465  | 0.177983  |
| H  | -2.651598 | -4.569465 | 0.177983  |
| H  | -2.651598 | 4.569465  | 0.177983  |
| H  | 2.651598  | -4.569465 | 0.177983  |
| H  | 4.569465  | 2.651598  | 0.177983  |
| H  | 4.569465  | -2.651598 | 0.177983  |
| H  | -4.569465 | -2.651598 | 0.177983  |
| H  | -4.569465 | 2.651598  | 0.177983  |
| H  | 0.000000  | 4.532646  | 0.083480  |
| H  | 4.532646  | 0.000000  | 0.083480  |
| H  | 0.000000  | -4.532646 | 0.083480  |
| H  | -4.532646 | 0.000000  | 0.083480  |

Cartesian coordinates (in Ångstrom) of the  $S_0(C_{4v})$  equilibrium geometry of TiOP optimized with the MP2/cc-pVDZ(TZVP at Ti) method.

38  
FINAL HEAT OF FORMATION = -1909.564650

|    |           |           |           |
|----|-----------|-----------|-----------|
| Ti | 0.000000  | 0.000000  | -0.552751 |
| O  | 0.000000  | 0.000000  | -2.198537 |
| N  | -1.456704 | 1.456704  | -0.017651 |
| N  | -1.456704 | -1.456704 | -0.017651 |
| N  | 1.456704  | -1.456704 | -0.017651 |
| N  | 1.456704  | 1.456704  | -0.017651 |
| C  | -3.503630 | 2.530150  | 0.106304  |
| C  | -3.503630 | -2.530150 | 0.106304  |
| C  | 3.503630  | -2.530150 | 0.106304  |
| C  | 3.503630  | 2.530150  | 0.106304  |
| C  | -2.820875 | 1.255546  | 0.029636  |
| C  | -2.820875 | -1.255546 | 0.029636  |
| C  | 2.820875  | -1.255546 | 0.029636  |
| C  | 2.820875  | 1.255546  | 0.029636  |
| C  | -1.255546 | 2.820875  | 0.029636  |
| C  | -1.255546 | -2.820875 | 0.029636  |
| C  | 1.255546  | -2.820875 | 0.029636  |
| C  | 1.255546  | 2.820875  | 0.029636  |
| C  | 2.530150  | 3.503630  | 0.106304  |
| C  | -2.530150 | 3.503630  | 0.106304  |
| C  | -2.530150 | -3.503630 | 0.106304  |
| C  | 2.530150  | -3.503630 | 0.106304  |
| C  | -3.450557 | 0.000000  | 0.030346  |
| C  | 0.000000  | -3.450557 | 0.030346  |
| C  | 3.450557  | 0.000000  | 0.030346  |
| C  | 0.000000  | 3.450557  | 0.030346  |
| H  | 2.658771  | 4.586004  | 0.165263  |
| H  | -2.658771 | -4.586004 | 0.165263  |
| H  | -2.658771 | 4.586004  | 0.165263  |
| H  | 2.658771  | -4.586004 | 0.165263  |
| H  | 4.586004  | 2.658771  | 0.165263  |
| H  | 4.586004  | -2.658771 | 0.165263  |
| H  | -4.586004 | -2.658771 | 0.165263  |
| H  | -4.586004 | 2.658771  | 0.165263  |
| H  | 0.000000  | 4.545418  | 0.072721  |
| H  | 4.545418  | 0.000000  | 0.072721  |
| H  | 0.000000  | -4.545418 | 0.072721  |
| H  | -4.545418 | 0.000000  | 0.072721  |

Cartesian coordinates (in Ångstrom) of the  $S_0(C_I)$  equilibrium geometry of the TiOP-H<sub>2</sub>O complex optimized with the DFT/B3LYP/cc-pVDZ(TZVP at Ti) method.

41

```
FINAL HEAT OF FORMATION = -1989.026460
N      0.156436      0.195496      2.026217
C     -0.951193      0.284651      2.842239
C     -0.533178      0.340437      4.223527
C      0.832766      0.287034      4.230987
C      1.259440      0.198695      2.853320
C     -2.273484      0.348540      2.400043
C     -2.703695      0.367889      1.071487
N     -1.880809      0.288764     -0.031985
C     -2.693723      0.383981     -1.142234
C     -4.069854      0.519334     -0.724727
C     -4.075458      0.509894      0.643483
C     -2.249788      0.382002     -2.467751
C     -0.921702      0.322274     -2.898159
N      0.177597      0.217445     -2.072287
C      1.289493      0.233297     -2.887196
C      0.877583      0.343397     -4.267637
C     -0.488707      0.398361     -4.274366
C      2.614122      0.186165     -2.443714
C      3.043734      0.152134     -1.114437
C      4.422849      0.179722     -0.684317
C      4.415793      0.170887      0.682933
C      3.032316      0.138494      1.098421
N      2.216035      0.122945     -0.012366
Ti     0.144449     -0.369623     -0.024239
O      0.073565     -1.999658     -0.029158
C      2.588637      0.156204      2.423414
O     -2.017888     -2.883453      1.695169
H      1.502532      0.312947      5.088730
H     -1.153757      0.494887     -5.130844
H      5.267767      0.196189      1.360101
H     -4.917659      0.621741     -1.400032
H     -1.208348      0.418544      5.073728
H     -4.928895      0.601478      1.313155
H      1.556421      0.384769     -5.117668
H      5.281716      0.214111     -1.352300
H      3.356738      0.168253      3.199143
H     -3.046319      0.408742      3.168130
H     -3.014501      0.466826     -3.242445
H      3.390409      0.209571     -3.210976
H     -2.675742     -2.790484      0.990299
H     -1.184215     -2.807808      1.192130
```

Cartesian coordinates (in Ångstrom) of the  $S_0(C_s)$  equilibrium geometry of the TiOP-H<sub>2</sub>O complex optimized with the DFT/B3LYP/cc-pVDZ(TZVP at Ti) method.

41  
FINAL HEAT OF FORMATION = -1989.024830

|    |           |           |           |
|----|-----------|-----------|-----------|
| C  | 4.441178  | 0.197661  | -0.683619 |
| C  | 3.059746  | 0.160289  | -1.106404 |
| N  | 2.238221  | 0.131880  | 0.000000  |
| C  | 3.059746  | 0.160289  | 1.106404  |
| C  | 4.441178  | 0.197661  | 0.683619  |
| C  | 2.622121  | 0.187540  | -2.433505 |
| C  | 1.294770  | 0.226903  | -2.870274 |
| N  | 0.187147  | 0.209175  | -2.050075 |
| C  | -0.916665 | 0.298301  | -2.871139 |
| C  | -0.491060 | 0.369323  | -4.250261 |
| C  | 0.875292  | 0.325463  | -4.249770 |
| C  | -2.243331 | 0.343911  | -2.434872 |
| C  | -2.681753 | 0.344832  | -1.107537 |
| N  | -1.862498 | 0.273014  | 0.000000  |
| C  | -2.681753 | 0.344832  | 1.107537  |
| C  | -4.058393 | 0.455894  | 0.684211  |
| C  | -4.058393 | 0.455894  | -0.684211 |
| C  | -2.243331 | 0.343911  | 2.434872  |
| C  | -0.916665 | 0.298301  | 2.871139  |
| C  | -0.491060 | 0.369323  | 4.250261  |
| C  | 0.875292  | 0.325463  | 4.249770  |
| C  | 1.294770  | 0.226903  | 2.870274  |
| N  | 0.187147  | 0.209175  | 2.050075  |
| Ti | 0.167529  | -0.365444 | 0.000000  |
| O  | 0.074207  | -1.991548 | 0.000000  |
| C  | 2.622121  | 0.187540  | 2.433505  |
| O  | -2.545353 | -3.266553 | 0.000000  |
| H  | 1.549644  | 0.365715  | 5.103386  |
| H  | -1.161107 | 0.452581  | -5.104128 |
| H  | 5.296595  | 0.232432  | 1.356012  |
| H  | -4.911446 | 0.534020  | -1.355913 |
| H  | -1.161107 | 0.452581  | 5.104128  |
| H  | -4.911446 | 0.534020  | 1.355913  |
| H  | 1.549644  | 0.365715  | -5.103386 |
| H  | 5.296595  | 0.232432  | -1.356012 |
| H  | 3.393990  | 0.210773  | 3.205324  |
| H  | -3.012877 | 0.410650  | 3.206349  |
| H  | -3.012877 | 0.410650  | -3.206349 |
| H  | 3.393990  | 0.210773  | -3.205324 |
| H  | -2.962548 | -2.393788 | 0.000000  |
| H  | -1.597260 | -3.038488 | 0.000000  |

Cartesian coordinates (in Ångstrom) of the <sup>1</sup>LMCT(A'') inner minimum geometry of the TiOP-H<sub>2</sub>O complex optimized with the DFT/B3LYP/cc-pVDZ(TZVP at Ti) method.

41  
FINAL HEAT OF FORMATION = -1988.925310

|    |           |           |           |
|----|-----------|-----------|-----------|
| N  | 2.217970  | 0.005757  | 0.000000  |
| C  | 3.043919  | 0.008894  | -1.106615 |
| C  | 4.423927  | -0.020039 | -0.684857 |
| C  | 4.423927  | -0.020039 | 0.684857  |
| C  | 3.043919  | 0.008894  | 1.106615  |
| C  | 2.608839  | 0.078708  | -2.434093 |
| C  | 1.285115  | 0.194519  | -2.870064 |
| N  | 0.179575  | 0.215526  | -2.047990 |
| C  | -0.916315 | 0.368320  | -2.869564 |
| C  | -0.489206 | 0.439128  | -4.249529 |
| C  | 0.873767  | 0.331772  | -4.249919 |
| C  | -2.241748 | 0.463088  | -2.434896 |
| C  | -2.684300 | 0.461917  | -1.108092 |
| N  | -1.868882 | 0.322523  | 0.000000  |
| C  | -2.684300 | 0.461917  | 1.108092  |
| C  | -4.050123 | 0.652799  | 0.685358  |
| C  | -4.050123 | 0.652799  | -0.685358 |
| C  | -2.241748 | 0.463088  | 2.434896  |
| C  | -0.916315 | 0.368320  | 2.869564  |
| N  | 0.179575  | 0.215526  | 2.047990  |
| C  | 1.285115  | 0.194519  | 2.870064  |
| C  | 0.873767  | 0.331772  | 4.249919  |
| C  | -0.489206 | 0.439128  | 4.249529  |
| Ti | 0.131835  | -0.396629 | 0.000000  |
| O  | -0.039860 | -2.267372 | 0.000000  |
| C  | 2.608839  | 0.078708  | 2.434093  |
| O  | -2.535637 | -3.205349 | 0.000000  |
| H  | 1.548897  | 0.349351  | 5.103950  |
| H  | -1.154113 | 0.561957  | -5.102904 |
| H  | 5.281705  | -0.025325 | 1.355457  |
| H  | -4.898836 | 0.781632  | -1.355040 |
| H  | -1.154113 | 0.561957  | 5.102904  |
| H  | -4.898836 | 0.781632  | 1.355040  |
| H  | 1.548897  | 0.349351  | -5.103950 |
| H  | 5.281705  | -0.025325 | -1.355457 |
| H  | 3.382104  | 0.075025  | 3.205296  |
| H  | -3.005343 | 0.581805  | 3.206488  |
| H  | -3.005343 | 0.581805  | -3.206488 |
| H  | 3.382104  | 0.075025  | -3.205296 |
| H  | -2.723584 | -2.255903 | 0.000000  |
| H  | -1.557570 | -3.241183 | 0.000000  |

Cartesian coordinates (in Ångstrom) of the <sup>1</sup>LMCT(A') inner minimum geometry of the TiOP-H<sub>2</sub>O complex optimized with the DFT/B3LYP/cc-pVDZ(TZVP at Ti) method.

41  
FINAL HEAT OF FORMATION = -1988.926440

|    |           |           |           |
|----|-----------|-----------|-----------|
| N  | 2.251476  | 0.069270  | 0.000000  |
| C  | 3.075645  | 0.078049  | -1.104335 |
| C  | 4.459380  | 0.085549  | -0.683651 |
| C  | 4.459380  | 0.085549  | 0.683651  |
| C  | 3.075645  | 0.078049  | 1.104335  |
| C  | 2.639591  | 0.098773  | -2.432673 |
| C  | 1.312617  | 0.155591  | -2.871315 |
| N  | 0.204372  | 0.163668  | -2.047244 |
| C  | -0.896079 | 0.302901  | -2.871165 |
| C  | -0.470165 | 0.351652  | -4.248883 |
| C  | 0.896535  | 0.261079  | -4.249056 |
| C  | -2.218702 | 0.421765  | -2.433713 |
| C  | -2.655099 | 0.458001  | -1.105594 |
| N  | -1.838086 | 0.346844  | 0.000000  |
| C  | -2.655099 | 0.458001  | 1.105594  |
| C  | -4.026519 | 0.635531  | 0.684416  |
| C  | -4.026519 | 0.635531  | -0.684416 |
| C  | -2.218702 | 0.421765  | 2.433713  |
| C  | -0.896079 | 0.302901  | 2.871165  |
| N  | 0.204372  | 0.163668  | 2.047244  |
| C  | 1.312617  | 0.155591  | 2.871315  |
| C  | 0.896535  | 0.261079  | 4.249056  |
| C  | -0.470165 | 0.351652  | 4.248883  |
| Ti | 0.165312  | -0.393372 | 0.000000  |
| O  | -0.009364 | -2.272432 | 0.000000  |
| C  | 2.639591  | 0.098773  | 2.432673  |
| O  | -2.823189 | -3.066780 | 0.000000  |
| H  | 1.569151  | 0.275190  | 5.105114  |
| H  | -1.135702 | 0.453932  | -5.104474 |
| H  | 5.315994  | 0.097073  | 1.355601  |
| H  | -4.876222 | 0.749739  | -1.355496 |
| H  | -1.135702 | 0.453932  | 5.104474  |
| H  | -4.876222 | 0.749739  | 1.355496  |
| H  | 1.569151  | 0.275190  | -5.105114 |
| H  | 5.315994  | 0.097073  | -1.355601 |
| H  | 3.412301  | 0.102381  | 3.204358  |
| H  | -2.984496 | 0.522438  | 3.205670  |
| H  | -2.984496 | 0.522438  | -3.205670 |
| H  | 3.412301  | 0.102381  | -3.204358 |
| H  | -3.136961 | -2.151780 | 0.000000  |
| H  | -1.854390 | -2.958370 | 0.000000  |



Cartesian coordinates (in Ångstrom) of the <sup>1</sup>LMCT(A'') outer (biradicalic) minimum geometry of the TiOP-H<sub>2</sub>O complex optimized with the DFT/B3LYP/cc-pVDZ(TZVP at Ti) method.

41  
FINAL HEAT OF FORMATION = -1988.928680

|    |           |           |           |
|----|-----------|-----------|-----------|
| C  | -0.504798 | 0.376004  | 4.251174  |
| C  | -0.928000 | 0.276997  | 2.870533  |
| N  | 0.173213  | 0.175192  | 2.049851  |
| C  | 1.277777  | 0.220454  | 2.869271  |
| C  | 0.861755  | 0.341133  | 4.250364  |
| C  | -2.256300 | 0.308076  | 2.435441  |
| C  | -2.699073 | 0.289232  | 1.107664  |
| N  | -1.880485 | 0.205426  | 0.000000  |
| C  | -2.699073 | 0.289232  | -1.107664 |
| C  | -4.077288 | 0.388837  | -0.686316 |
| C  | -4.077288 | 0.388837  | 0.686316  |
| C  | -2.256300 | 0.308076  | -2.435441 |
| C  | -0.928000 | 0.276997  | -2.870533 |
| N  | 0.173213  | 0.175192  | -2.049851 |
| C  | 1.277777  | 0.220454  | -2.869271 |
| C  | 0.861755  | 0.341133  | -4.250364 |
| C  | -0.504798 | 0.376004  | -4.251174 |
| C  | 2.606314  | 0.188423  | -2.431313 |
| C  | 3.044404  | 0.154641  | -1.103448 |
| N  | 2.222962  | 0.104884  | 0.000000  |
| C  | 3.044404  | 0.154641  | 1.103448  |
| C  | 4.428250  | 0.215109  | 0.683541  |
| C  | 4.428250  | 0.215109  | -0.683541 |
| Ti | 0.153125  | -0.473649 | 0.000000  |
| O  | 0.058433  | -2.282345 | 0.000000  |
| C  | 2.606314  | 0.188423  | 2.431313  |
| O  | -2.600500 | -2.855048 | 0.000000  |
| H  | 1.536179  | 0.402010  | 5.103069  |
| H  | -1.174323 | 0.470463  | -5.104714 |
| H  | 5.283431  | 0.265273  | 1.355708  |
| H  | -4.932267 | 0.471138  | -1.355893 |
| H  | -1.174323 | 0.470463  | 5.104714  |
| H  | -4.932267 | 0.471138  | 1.355893  |
| H  | 1.536179  | 0.402010  | -5.103069 |
| H  | 5.283431  | 0.265273  | -1.355708 |
| H  | 3.378697  | 0.230649  | 3.202448  |
| H  | -3.024879 | 0.385853  | 3.207654  |
| H  | -3.024879 | 0.385853  | -3.207654 |
| H  | 3.378697  | 0.230649  | -3.202448 |
| H  | -3.248782 | -2.116988 | 0.000000  |
| H  | -0.690932 | -2.901248 | 0.000000  |

Cartesian coordinates (in Ångstrom) of the <sup>1</sup>LMCT(A') outer (biradicalic) minimum geometry of the TiOP-H<sub>2</sub>O complex optimized with the DFT/B3LYP/cc-pVDZ(TZVP at Ti) method.

41  
FINAL HEAT OF FORMATION = -1988.932060

|    |           |           |           |
|----|-----------|-----------|-----------|
| C  | -0.484176 | 0.391966  | 4.253883  |
| C  | -0.907262 | 0.289323  | 2.872190  |
| N  | 0.195779  | 0.195008  | 2.052559  |
| C  | 1.298734  | 0.242477  | 2.870813  |
| C  | 0.882089  | 0.364672  | 4.252925  |
| C  | -2.235316 | 0.297252  | 2.437011  |
| C  | -2.679564 | 0.272712  | 1.107157  |
| N  | -1.860374 | 0.238762  | 0.000000  |
| C  | -2.679564 | 0.272712  | -1.107157 |
| C  | -4.062540 | 0.305243  | -0.686636 |
| C  | -4.062540 | 0.305243  | 0.686636  |
| C  | -2.235316 | 0.297252  | -2.437011 |
| C  | -0.907262 | 0.289323  | -2.872190 |
| N  | 0.195779  | 0.195008  | -2.052559 |
| C  | 1.298734  | 0.242477  | -2.870813 |
| C  | 0.882089  | 0.364672  | -4.252925 |
| C  | -0.484176 | 0.391966  | -4.253883 |
| C  | 2.627475  | 0.199789  | -2.431606 |
| C  | 3.064104  | 0.154461  | -1.103484 |
| N  | 2.242923  | 0.107732  | 0.000000  |
| C  | 3.064104  | 0.154461  | 1.103484  |
| C  | 4.449555  | 0.204497  | 0.683207  |
| C  | 4.449555  | 0.204497  | -0.683207 |
| Ti | 0.160939  | -0.446230 | 0.000000  |
| O  | -0.076249 | -2.237023 | 0.000000  |
| C  | 2.627475  | 0.199789  | 2.431606  |
| O  | -2.873189 | -2.946196 | 0.000000  |
| H  | 1.556034  | 0.428313  | 5.105818  |
| H  | -1.153946 | 0.482631  | -5.107673 |
| H  | 5.305035  | 0.249656  | 1.355359  |
| H  | -4.921121 | 0.341568  | -1.355695 |
| H  | -1.153946 | 0.482631  | 5.107673  |
| H  | -4.921121 | 0.341568  | 1.355695  |
| H  | 1.556034  | 0.428313  | -5.105818 |
| H  | 5.305035  | 0.249656  | -1.355359 |
| H  | 3.400943  | 0.240563  | 3.201695  |
| H  | -3.005628 | 0.351667  | 3.209593  |
| H  | -3.005628 | 0.351667  | -3.209593 |
| H  | 3.400943  | 0.240563  | -3.201695 |
| H  | -3.304845 | -2.060153 | 0.000000  |
| H  | -0.949593 | -2.680493 | 0.000000  |

Cartesian coordinates (in Ångstrom) of the  $^2B_1$  minimum geometry of the  $TiPOH^\bullet$  radical optimized with the DFT/B3LYP/cc-pVDZ(TZVP at Ti) method.

39

FINAL HEAT OF FORMATION = -1913.219530

|    |           |           |           |
|----|-----------|-----------|-----------|
| Ti | 0.000000  | 0.000000  | -0.609511 |
| O  | 0.000000  | 0.000000  | -2.399081 |
| H  | 0.000000  | 0.000000  | -3.357618 |
| N  | -1.448107 | 1.448107  | 0.040487  |
| N  | -1.448107 | -1.448107 | 0.040487  |
| N  | 1.448107  | -1.448107 | 0.040487  |
| N  | 1.448107  | 1.448107  | 0.040487  |
| C  | -3.488507 | 2.521364  | 0.215121  |
| C  | -3.488507 | -2.521364 | 0.215121  |
| C  | 3.488507  | -2.521364 | 0.215121  |
| C  | 3.488507  | 2.521364  | 0.215121  |
| C  | -2.809134 | 1.248414  | 0.112400  |
| C  | -2.809134 | -1.248414 | 0.112400  |
| C  | 2.809134  | -1.248414 | 0.112400  |
| C  | 2.809134  | 1.248414  | 0.112400  |
| C  | -1.248414 | 2.809134  | 0.112400  |
| C  | -1.248414 | -2.809134 | 0.112400  |
| C  | 1.248414  | -2.809134 | 0.112400  |
| C  | 1.248414  | 2.809134  | 0.112400  |
| C  | 2.521364  | 3.488507  | 0.215121  |
| C  | -2.521364 | 3.488507  | 0.215121  |
| C  | -2.521364 | -3.488507 | 0.215121  |
| C  | 2.521364  | -3.488507 | 0.215121  |
| C  | -3.438942 | 0.000000  | 0.124429  |
| C  | 0.000000  | -3.438942 | 0.124429  |
| C  | 3.438942  | 0.000000  | 0.124429  |
| C  | 0.000000  | 3.438942  | 0.124429  |
| H  | 2.649074  | 4.567298  | 0.291982  |
| H  | -2.649074 | -4.567298 | 0.291982  |
| H  | -2.649074 | 4.567298  | 0.291982  |
| H  | 2.649074  | -4.567298 | 0.291982  |
| H  | 4.567298  | 2.649074  | 0.291982  |
| H  | 4.567298  | -2.649074 | 0.291982  |
| H  | -4.567298 | -2.649074 | 0.291982  |
| H  | -4.567298 | 2.649074  | 0.291982  |
| H  | 0.000000  | 4.529435  | 0.187631  |
| H  | 4.529435  | 0.000000  | 0.187631  |
| H  | 0.000000  | -4.529435 | 0.187631  |
| H  | -4.529435 | 0.000000  | 0.187631  |

Cartesian coordinates (in Ångstrom) of the  $^2A_1$  minimum geometry of the  $TiPOH^\bullet$  radical optimized with the DFT/B3LYP/cc-pVDZ(TZVP at Ti) method.

39

```
FINAL HEAT OF FORMATION = -1913.163110
Ti    0.000000    0.000000   -0.630872
O     0.000000    0.000000   -2.483317
H     0.000000    0.000000   -3.454724
N    -1.454121    1.454121    0.026087
N    -1.454121   -1.454121    0.026087
N     1.454121   -1.454121    0.026087
N     1.454121    1.454121    0.026087
C    -3.489543    2.522566    0.227497
C    -3.489543   -2.522566    0.227497
C     3.489543   -2.522566    0.227497
C     3.489543    2.522566    0.227497
C    -2.811786    1.249909    0.108027
C    -2.811786   -1.249909    0.108027
C     2.811786   -1.249909    0.108027
C     2.811786    1.249909    0.108027
C    -1.249909    2.811786    0.108027
C    -1.249909   -2.811786    0.108027
C     1.249909   -2.811786    0.108027
C     1.249909    2.811786    0.108027
C     2.522566    3.489543    0.227497
C    -2.522566    3.489543    0.227497
C    -2.522566   -3.489543    0.227497
C     2.522566   -3.489543    0.227497
C    -3.441274    0.000000    0.120452
C     0.000000   -3.441274    0.120452
C     3.441274    0.000000    0.120452
C     0.000000    3.441274    0.120452
H     2.648734    4.567409    0.316539
H    -2.648734   -4.567409    0.316539
H    -2.648734    4.567409    0.316539
H     2.648734   -4.567409    0.316539
H     4.567409    2.648734    0.316539
H     4.567409   -2.648734    0.316539
H    -4.567409   -2.648734    0.316539
H    -4.567409    2.648734    0.316539
H     0.000000    4.530952    0.191565
H     4.530952    0.000000    0.191565
H     0.000000   -4.530952    0.191565
H    -4.530952    0.000000    0.191565
```
